# Supplementary material
Source: Springer Nature journal article supplement (https://www.springerprofessional.de/resource/supplementary/13677_2012_13_MOESM6_ESM.pdf/10743464)
Supplement: MOESM6 [file 10743464]

# SAaaS VM Agent Management

Welcome  
SAaaS VM Agent  
Platform Check  
SAaaS VM Agent  
Management

## SAaaS VM Agent Management

Infos for this VM:

Hostname: SAaaSdemo1

FQDN: SAaaSdemo1.research.wolke.hs-furtwangen.de

Deployable agent-SSLAs:

webserver ▾

Status:

Deploy agents

collector agent deployed  
fed agent deployed  
net agent deployed  
inotify agent deployed

Running agents:

| Shortname | Description   |
|-----------|---------------|
| amm       | SAaaS-Runtime |
| df        | SAaaS-Runtime |
| ams       | SAaaS-Runtime |

Update list
